# Supplementary material for: Citizen science reveals silent habitat loss and expansion in 1,864 native vascular plant species in Kanagawa, Japan
Source: Research Square preprint supplement (doi:10.21203/rs.3.rs-7156722/v1), 2025-08-08
Supplement: Supplementary file 1 [file d5029da2c03dddd08bf89dd2.pdf]

## Supplementary Information

**Fig. S1**

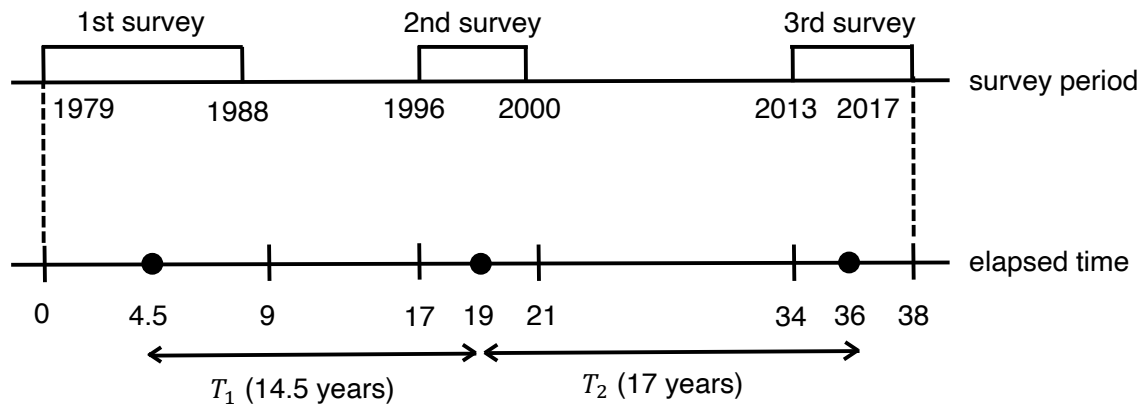

**Fig. S1 | Temporal framework of the study.** The upper horizontal axis shows the durations of the 1st, 2nd, and 3rd surveys. The lower horizontal axis displays the median years of the 1st, 2nd, and 3rd survey periods, as well as the durations of Interval 1 ( $T_1$ ) and Interval 2 ( $T_2$ ), in years, which were used to calculate d-rates.

**Table S1**

**Table S1 | Ecological characteristics of the taxa in the top 10% for disappearance rates.** Comparisons of the proportional representation of habitat types and lifeforms between the *Top 10% group* and all other taxa. The degrees of freedom were 11 and 7 for the tests of proportional representation across habitat types and lifeforms, respectively.

| Category         |          | p-value<br>(95%CI)         | Chi-square value | Cramer's V | Significantly overrepresented habitats or lifeforms<br>(asresid) | Required sample size<br>(power = 0.8) | Min expected freq. | Cells <5 (%) |
|------------------|----------|----------------------------|------------------|------------|------------------------------------------------------------------|---------------------------------------|--------------------|--------------|
| Top 10% group_d1 | habitat  | <0.001<br>(0.0000, 0.0004) | 65.29            | 0.1872     | grassland (6.49)                                                 | 480                                   | 0.61               | 0.167        |
| Top 10% group_d2 | habitat  | <0.001<br>(0.0000, 0.0007) | 39.15            | 0.1449     | open freshwater body (2.87), grassland (2.24)                    | 800                                   | 0.66               | 0.167        |
| Top 10% group_d1 | lifeform | 0.0586                     | 13.61            | 0.0854     | none                                                             | 1966                                  | 2.19               | 2 (8.3%)     |
| Top 10% group_d2 | lifeform | <0.0001                    | 73.13            | 0.1981     | bamboo (5.93), aquatic plant (3.51)                              | 366                                   | 0.5                | 4 (16.7%)    |

**Table S2**

**Table S2 | The number of potentially threatened taxa.** The number of potentially threatened taxa classified by **(a)** habitat and **(b)** lifeform.

**a**

| Habitat                        | Number of taxa |
|--------------------------------|----------------|
| forest edge                    | 15             |
| grassland                      | 15             |
| deciduous forest               | 13             |
| wetland                        | 8              |
| coastal and marine environment | 3              |
| evergreen forest               | 3              |
| wasteland                      | 3              |
| riparian zone                  | 2              |
| rocky habitat                  | 2              |
| open freshwater body           | 1              |
| upland field                   | 1              |
| subalpine habitat              | 0              |

**b**

| Lifeform       | Number of taxa |
|----------------|----------------|
| perennial herb | 36             |
| annual herb    | 8              |
| fern           | 7              |
| shrub          | 7              |
| bamboo         | 3              |
| vine           | 3              |
| tree           | 2              |
| aquatic plant  | 0              |
